# Supplementary material for: Optimization and characterization of biosurfactant produced by indigenous Brevibacillus borstelensis isolated from a low permeability reservoir for application in MEOR
Source: Royal Society of Chemistry journal article supplement (doi:10.1039/d1ra07663a), 2022-01-01
Supplement: d1ra07663a1.pdf [file d1ra07663a1.pdf]

**Optimization and characterization of biosurfactant produced by indigenous  
*Brevibacillus borstelensis* isolated from a low permeability reservoir for  
application in MEOR**

**Hao Dong<sup>1</sup>, Anying Zheng<sup>2</sup>, Yanlong He<sup>3</sup>, Xiaotong Wang<sup>4</sup>, Yang Li<sup>2</sup>, Gaoming  
Yu<sup>2</sup>, Yongan Gu<sup>2</sup>, I.M.Banat<sup>5</sup>, Shanshan Sun<sup>2</sup>, Yuehui She<sup>2,\*</sup>, Fan Zhang<sup>7,\*</sup>**

<sup>1</sup>College of Chemistry and Environmental Engineering, Yangtze University, Jingzhou  
434023, China

<sup>2</sup>College of Petroleum Engineering, Yangtze University, Wuhan, Hubei 430010, China

<sup>3</sup>College of Petroleum Engineering, Xi'an Shiyou University, Xi'an 710065, China

<sup>4</sup>State Key Laboratory of Microbial Resources & CAS Key Laboratory of Microbial  
Physiological and Metabolic Engineering, Institute of Microbiology, Chinese Academy  
of Sciences, Beijing 100101, China; University of Chinese Academy of Sciences,  
Beijing 100049, PR China

<sup>5</sup>Faculty of Life and Health Sciences, School of Biomedical Sciences, University of  
Ulster, Northern Ireland, UK

<sup>6</sup>The Key Laboratory of Marine Reservoir Evolution and Hydrocarbon Accumulation  
Mechanism, Ministry of Education, College of Energy Resources, China University of  
Geosciences (Beijing), Beijing 100083, China

**\* Correspondence:** \*Corresponding author.

E-mail: sheyuehui@163.com, fanzhang123@126.com

The following are the Supplementary data to this article:

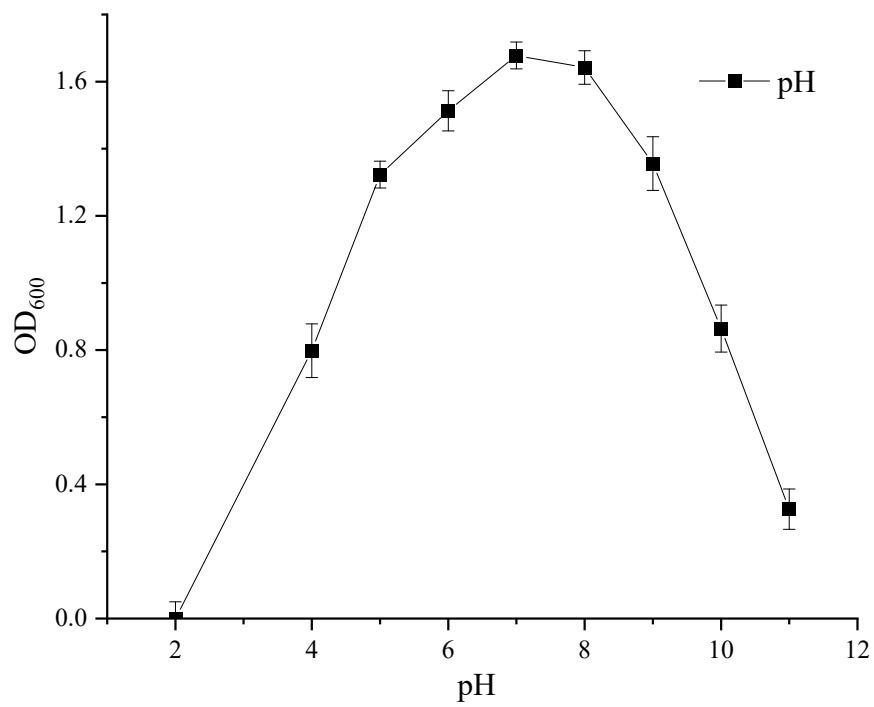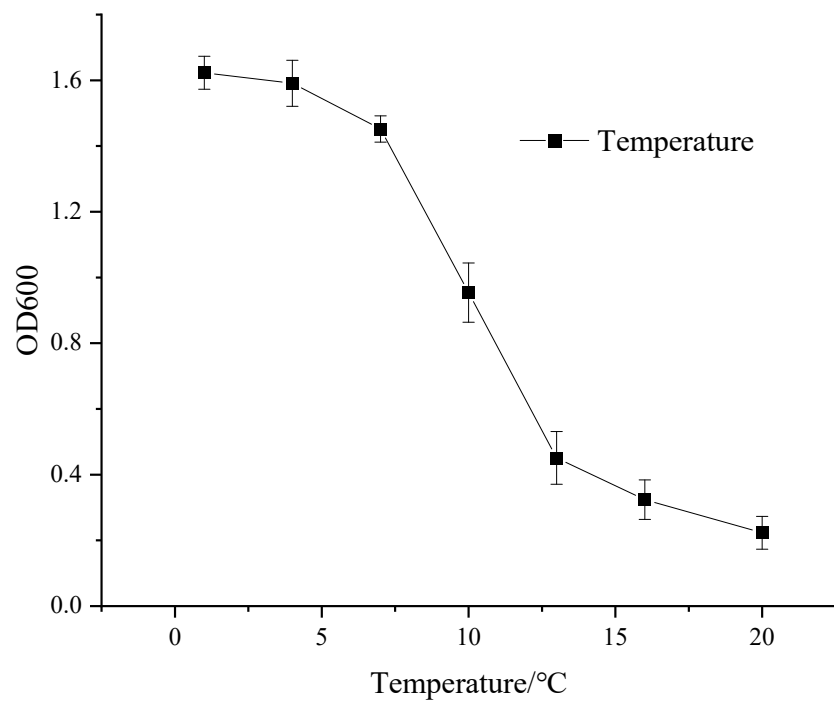

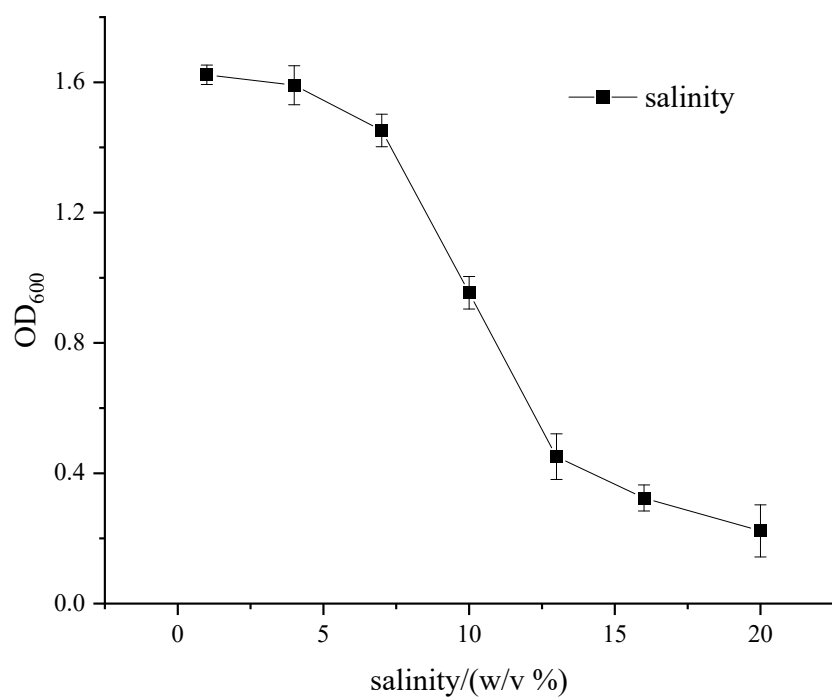

Figure S1 The effect of pH, temperature, salinity on the growth of strain YZ-2

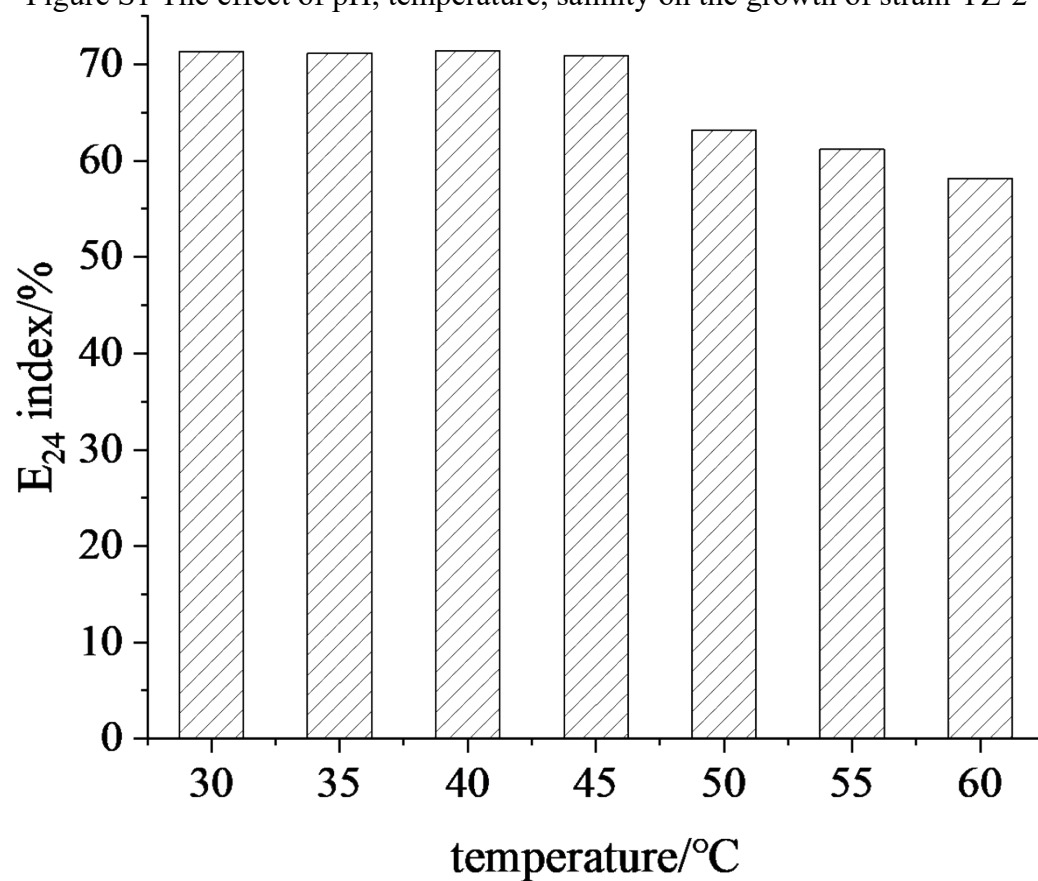

Figure S2 Effect of temperature on emulsifying activity of biosurfactant produced by YZ-2 (kerosene)

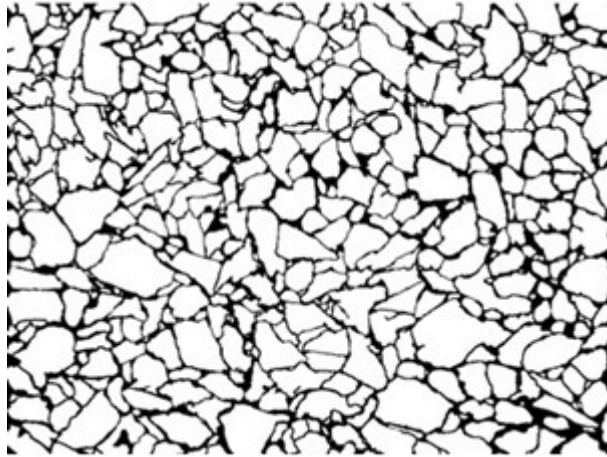

Figure S3 Micrograph of rock core and micro-glass model

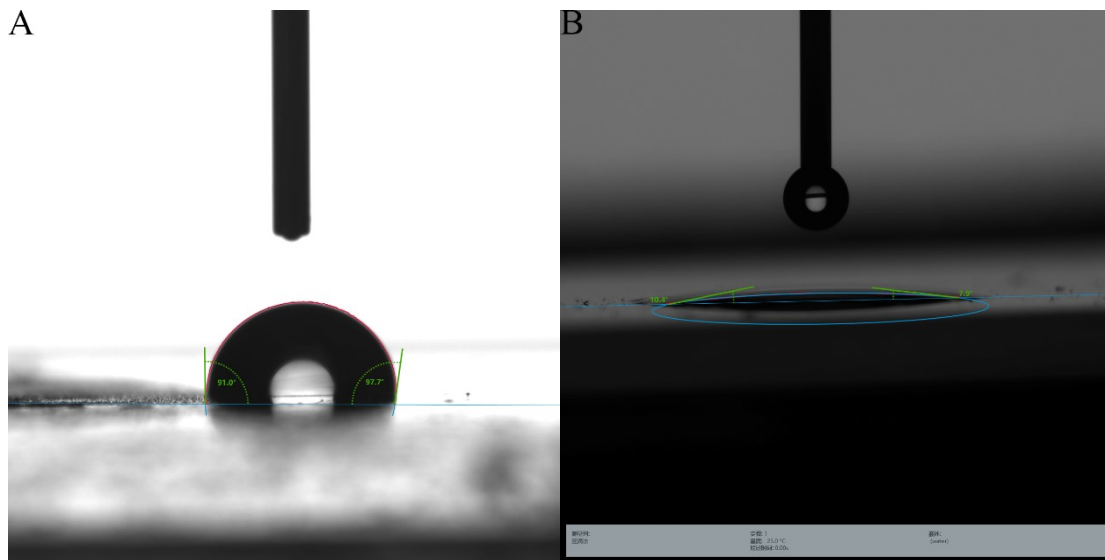

Figure S4 A: the contact angle of water on the oil aged glass surface; B the contact angle of biosurfactant solution on the glass surface which was treated by biosurfactant solution after oil aged.

Table S1 The parameters of the cores

|        | Size (mm) | Diameter(mm) | Length(mm) | permeability/10 <sup>-3</sup> μm <sup>2</sup> | porosity/% |
|--------|-----------|--------------|------------|-----------------------------------------------|------------|
| core A | 25.0×72.4 | 25           | 72.4       | 47.54                                         | 9.89       |
| core B | 25.0×70.4 | 25           | 70.4       | 42.32                                         | 8.46       |
| core C | 25.0×69.3 | 25           | 69.3       | 45.33                                         | 9.04       |
| core D | 25.0×72.6 | 25           | 72.6       | 46.22                                         | 9.33       |

Table S2 Crude oil properties

| Degassed oil viscosity<br>at 30°C | Degassed oil density<br>at 30°C | SARA content (weight percent) |          |       |            |
|-----------------------------------|---------------------------------|-------------------------------|----------|-------|------------|
|                                   |                                 | Saturate                      | Aromatic | Resin | Asphaltene |
| 7.69 mPa.s                        | 0.8559                          | 63.2                          | 24.7     | 10.2  | 1.9        |

Table S3 Ion composition of formation water

| Ion                 | Na <sup>+</sup> | Mg <sup>2+</sup> | Ca <sup>2+</sup> | K <sup>+</sup> | CO <sub>3</sub> <sup>2-</sup> | Cl <sup>-</sup> | NO <sub>3</sub> <sup>-</sup> | HCO <sub>3</sub> <sup>-</sup> |
|---------------------|-----------------|------------------|------------------|----------------|-------------------------------|-----------------|------------------------------|-------------------------------|
| Concentration(mg/L) | 1271.56         | 16.71            | 29.58            | 4.15           | 201.24                        | 523.56          | 3.7                          | 947.71                        |
